# Supplementary material for: New sulfur-oxygen mixed-donor ligand N,N'-dimethyl-piperazine-3-oxo-2-thione (Me2pipto) and its Ni(ii) and Fe(ii) complexes
Source: Royal Society of Chemistry journal article supplement (doi:10.1039/c0dt00803f), 2010-01-01
Supplement: c0dt00803f.pdf [file c0dt00803f.pdf]

## **Supplementary Material**

### **New Sulphur-Oxygen Mixed-Donor ligand *N,N'*-dimethyl-piperazine-3-oxo-2-thione (Me<sub>2</sub>pipto) and its Ni(II) and Fe(II) complexes.**

Luca Pilia,<sup>a</sup> Flavia Artizzu,<sup>a</sup> Davide Espa,<sup>a</sup> Luciano Marchiò,<sup>b</sup> Maria Laura Mercuri,<sup>a</sup> Angela Serpe,<sup>a</sup> and  
Paola Deplano\*<sup>a</sup>

<sup>a</sup> *Dipartimento di Chimica Inorganica ed Analitica, Università di Cagliari, I-09042 Monserrato, Italy. Fax: +39 0706754456; Tel: +39 0706754456; E-mail: [deplano@unica.it](mailto:deplano@unica.it)*

<sup>b</sup> *Dipartimento di Chimica Generale ed Inorganica, Chimica Analitica, Chimica Fisica, Università di Parma, Parco Area delle Scienze 17A, I-43100 Parma, Italy.*

## Experimental section

All the reagents and solvents were purchased from Aldrich and used without further purification.

### Preparation

**Me<sub>2</sub>pipto (1).** *Synthesis:* 3.00 g (21.1 mmol) of *N,N'*-dialkyl-piperazine-2-,3-dione and 5.12 g (12.6 mmol) of Lawesson's reagent (molar ratio 1:0.6) were placed at reflux in 300 ml of toluene until the color of the solution turned from pale yellow to light brown. The solvent was evaporated and the crude product washed several times with petroleum ether 40/60 and dissolved with hot ethanol. A crystalline yellow precipitate appeared and the precipitation was completed on cooling (-18 °C for three hours) by addition of diethyl ether. The product was collected by filtration and washed with cold EtOH (three times) and with diethyl ether (three times) (yield 1.98 g, 12.5 mmol; 59.3%). Analytical results are in accordance with the formula Me<sub>2</sub>pipto. *Elemental Analysis:* calculated for C<sub>6</sub>H<sub>10</sub>N<sub>2</sub>OS (158.22): C 45.55, H 6.37, N 17.71, S 20.27; found: C 45.32, H 6.77, N 17.73, S 20.55. *UV-vis* (in CH<sub>3</sub>CN solution):  $\lambda/\text{nm}$  ( $\epsilon/\text{mol}\cdot\text{cm}^{-1}\cdot\text{dm}^{-3}$ ) 310 ( $7.35\cdot 10^3$ ); 265 ( $4.65\cdot 10^3$ ). *FT-IR* (KBr):  $\nu_{\text{max}}/\text{cm}^{-1}$  2970(w); 2954(w); 2920(mw); 2878(w); 2859(w); 1669(vs); 1527(vs); 1487(s); 1453(s); 1453(s); 1429(ms); 1395(s); 1348(vs); 1260(s); 1199(s); 1151(m); 1046(mw); 1019(w); 955(s); 894(ms); 837(w); 762(s); 687(ms); 582(ms); 549(mw); 494(m); 420(ms).

**[Ni(Me<sub>2</sub>pipto)<sub>3</sub>](BF<sub>4</sub>)<sub>2</sub> (2).** *Synthesis:* 80.0 mg (0.51 mmol) of **1** in 25 ml of CH<sub>2</sub>Cl<sub>2</sub>, yellow solution, was added drop-wise to a solution of NiCl<sub>2</sub>·6H<sub>2</sub>O (58.3 mg, 0.25 mmol) in EtOH (50 ml). After 1 hour of warming (60°C) and stirring, the solvent was evaporated and the obtained crude product dissolved with ethanol (30 ml) and filtered, then 55.0 mg of NaBF<sub>4</sub> in 50 ml of EtOH were added to the solution, and after 1 hour under stirring, 80 ml of diethyl ether were added. A crystalline green-yellow solid appeared 14 hours after, the precipitate was collected by filtration and washed with a cold H<sub>2</sub>O/EtOH (1:1) mixture (once), acetone/diethyl ether (1:1, two times) and diethyl ether (three times) (yield 34.2 mg,  $4.8\cdot 10^{-2}$  mmol; 38.7%). Analytical results are in accordance with the formula [Ni(Me<sub>2</sub>pipto)<sub>3</sub>](BF<sub>4</sub>)<sub>2</sub>. *Elemental Analysis:* calculated for C<sub>18</sub>H<sub>30</sub>N<sub>6</sub>O<sub>3</sub>S<sub>3</sub>NiB<sub>2</sub>F<sub>8</sub> (706.95): C 30.58, H 4.28, N 11.89, S 13.60; found: C 30.21, H 4.38, N 11.43, S 13.34. *UV-vis* (in CH<sub>3</sub>CN solution):  $\lambda/\text{nm}$  ( $\epsilon/\text{mol}\cdot\text{cm}^{-1}\cdot\text{dm}^{-3}$ ) 370 (sh); 310 ( $2.10\cdot 10^4$ ); 275 ( $1.90\cdot 10^4$ ). *FT-IR* (KBr):  $\nu_{\text{max}}/\text{cm}^{-1}$  2978(w); 2925(w); 1642(vs); 1559(vs); 1494(ms); 1443(mw); 1408(ms); 1368(s); 1263(ms); 1209(ms); 1159(ms); 1106(s); 1028(s); 963(m); 898(m); 830(w); 754(m); 696(m); 583(m); 562(m); 533(m); 521(m); 494(m); 448(m).

**[Fe(Me<sub>2</sub>pipto)<sub>3</sub>](BF<sub>4</sub>)<sub>2</sub> (3).** *Synthesis:* 316.0 mg (2.0 mmol) of **1** in 40 ml of CH<sub>3</sub>CN, yellow solution, was added drop-wise to a suspension of Fe<sub>2</sub>(SO<sub>4</sub>)<sub>3</sub>.xH<sub>2</sub>O (133.0 mg, 0.34 mmol) in the same solvent (50 ml); after adding few drops of H<sub>2</sub>SO<sub>4</sub> 96% the solution turned orange. After the addition of 240 mg of NaBF<sub>4</sub> (2,2 mmol) the solution turned red-violet during the stirring at reflux (3 h). The solvent was evaporated and the crude product dissolved with CH<sub>3</sub>CN (60 ml). This solution was filtered to separate a white solid, and Na<sub>2</sub>SO<sub>4</sub> was added to remove water. The addition of THF caused the formation of a white precipitate that was removed before a drop-wise addition of diethyl ether; the formed lacquer, became slowly a crystalline solid that was recrystallized from acetone/Et<sub>2</sub>O; the precipitate was collected by filtration and washed with diethyl ether (three times) (yield 55.4 mg, 0.078 mmol; 23.4%). Analytical results are in accordance with the formula [Fe(Me<sub>2</sub>pipto)<sub>3</sub>](BF<sub>4</sub>)<sub>2</sub>. *Elemental Analysis:* calculated for C<sub>18</sub>H<sub>30</sub>N<sub>6</sub>O<sub>3</sub>S<sub>3</sub>FeB<sub>2</sub>F<sub>8</sub> (704.11): C 30.70, H 4.29, N 11.94, S 13.66; found: C 31.00, H 3.91, N 11.94, S 13.30. *UV-vis* (in CH<sub>3</sub>CN solution): λ/nm (ε/mol·cm<sup>-1</sup>·dm<sup>-3</sup>) 530 (400); 430 (500); 310 (1.73·10<sup>4</sup>); 270 (1.63·10<sup>4</sup>). *FT-IR* (KBr): ν<sub>max</sub>/cm<sup>-1</sup> 2930(w); 2859(vw); 1639(vs); 1558(vs); 1507(w); 1489(w); 1439(w); 1404(mw); 1369(m); 1262(w); 1208(mw); 1160(w); 1083(ms); 1054(s); 961(w); 896(w); 830(vw); 755(w); 695(w); 668(vw); 584(mw); 521(w); 501(vw); 418(m).

### Measurements

Elemental analyses were performed by means of a Carlo Erba CHNS Elemental Analyzer Model EA1108. Electronic spectra (900–200 nm) were recorded on a Cary 5 spectrophotometer in CH<sub>3</sub>CN solutions. I.R. spectrum (4000–400 cm<sup>-1</sup>) was recorded with a Bruker IFS55 FT-IR Spectrometer on KBr pellets. Cyclic voltammograms were carried out with a *Princeton Applied Research* potentiostat-galvanostat model Versastat 3, by using a conventional three-electrode cell consisting of a platinum wire working electrode, a platinum wire as counter-electrode and Ag/AgCl in 3 M KCl solution, as reference electrode. The experiments were performed at room temperature (25°C), with the analyte in the concentration of 5·10<sup>-3</sup> M, in dry and argon-degassed CH<sub>3</sub>CN containing 0.1 mol dm<sup>-3</sup> Bu<sub>4</sub>NPF<sub>6</sub> as supporting electrolyte, at 100 mV s<sup>-1</sup> scan rate. Half-wave potential for ferrocene/ferrocenium couple (internal standard) is 0.43 V under the above conditions.

*DFT calculations.*

DFT calculations were carried out using the Gaussian 03 program suite.<sup>1</sup> Geometry optimization were performed for the Me<sub>2</sub>pipto and Me<sub>2</sub>pipdt ligands starting from X-ray geometries. The calculation were performed with the gradient-corrected hybrid density functional B3LYP<sup>2,3</sup> and with the 6-31G(d) basis set.<sup>4,5</sup> Molecular orbital diagrams were generated with the GaussView program.<sup>6</sup> The geometry optimizations of [Fe(Me<sub>2</sub>pipto)<sub>3</sub>]<sup>2+</sup> and [Fe(Me<sub>2</sub>pipdt)<sub>3</sub>]<sup>2+</sup> were performed starting from the X-ray geometries for both the singlet (S=0) and quintet (S=2) states, using the pure density functional OLYP<sup>7</sup> and the 6-31G(d) basis set. Vibrational frequencies were calculated at the same level of theory to ensure that the stationary points were true minima. Single point calculations were performed with the OLYP and B3LYP density functionals and with the 6-311G(d) basis set.

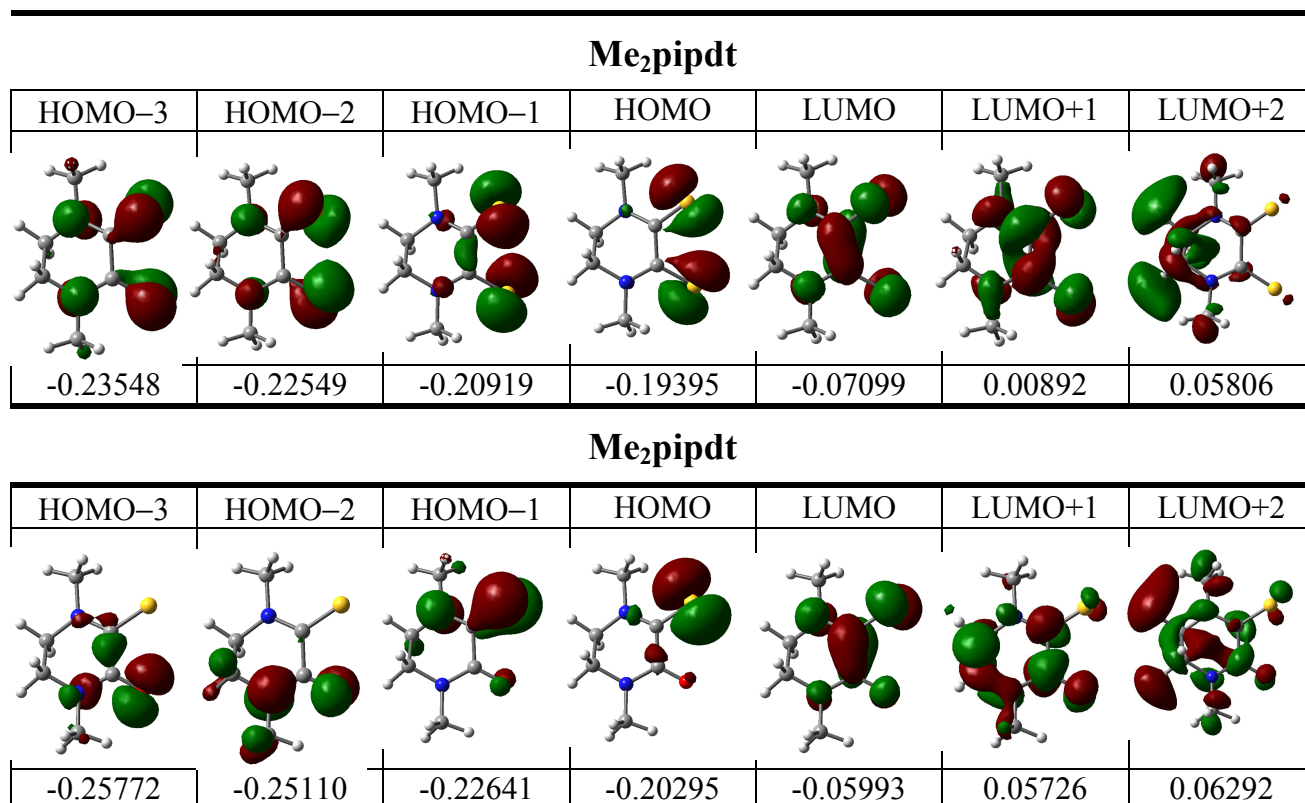

**Fig. S1.** Molecular orbital diagrams of Me<sub>2</sub>pipto and Me<sub>2</sub>pipdt with the isosurface plot at 0.04 a.u.. The MO energies are reported in hartrees. The larger HOMO-LUMO gap for the Me<sub>2</sub>pipto is in agreement with the increased *hard* character of this ligand if compared to Me<sub>2</sub>pipdt.<sup>8</sup>

**Table S1.** Relative energies (kJ/mol) and selected bond distances (Å) of [Fe(Me<sub>2</sub>pipto)<sub>3</sub>]<sup>2+</sup> and [Fe(Me<sub>2</sub>pipdt)<sub>3</sub>]<sup>2+</sup> in singlet and quintet spin states.

|                                                         | X-ray                 | OLYP  |       | B3LYP |       |
|---------------------------------------------------------|-----------------------|-------|-------|-------|-------|
|                                                         |                       | S = 0 | S = 2 | S = 0 | S = 2 |
| Relative Energy                                         |                       |       |       |       |       |
| [Fe(Me <sub>2</sub> pipto) <sub>3</sub> ] <sup>2+</sup> |                       | 60.14 | 0     | 96.56 | 0     |
| [Fe(Me <sub>2</sub> pipdt) <sub>3</sub> ] <sup>2+</sup> |                       | 0     | 31.88 | 41.48 | 0     |
| Bond distances                                          |                       |       |       |       |       |
| [Fe(Me <sub>2</sub> pipto) <sub>3</sub> ] <sup>2+</sup> |                       |       |       |       |       |
| Fe-O                                                    | 2.041(6) <sup>a</sup> | 1.932 | 2.126 | -     | -     |
|                                                         | 2.072(3)              | 1.973 | 2.105 |       |       |
|                                                         |                       | 1.935 | 2.056 |       |       |
| Fe-S                                                    | 2.465(2) <sup>a</sup> | 2.291 | 2.518 | -     | -     |
|                                                         | 2.511(3)              | 2.290 | 2.566 |       |       |
|                                                         |                       | 2.243 | 2.538 |       |       |
| [Fe(Me <sub>2</sub> pipdt) <sub>3</sub> ] <sup>2+</sup> |                       |       |       |       |       |
| Fe-S                                                    | 2.278(2) <sup>a</sup> | 2.273 | 2.471 | -     | -     |
|                                                         | 2.291(2)              | 2.272 | 2.471 |       |       |
|                                                         | 2.315(1)              | 2.270 | 2.513 |       |       |
|                                                         |                       | 2.276 | 2.543 |       |       |
|                                                         |                       | 2.275 | 2.543 |       |       |
|                                                         |                       | 2.272 | 2.512 |       |       |

a: crystallographic symmetry elements reduce the number of independent parameters.

**Table S2.** Mulliken spin densities and  $\langle S^2 \rangle$  expectation value of [Fe(Me<sub>2</sub>pipto)<sub>3</sub>]<sup>2+</sup> and [Fe(Me<sub>2</sub>pipdt)<sub>3</sub>]<sup>2+</sup> in the quintet spin state (S=2), basis set 6-311G(d).

|                                                         |       | OLYP  |       |                      |                       |       | B3LYP |                      |   |                       |
|---------------------------------------------------------|-------|-------|-------|----------------------|-----------------------|-------|-------|----------------------|---|-----------------------|
|                                                         |       | Fe    | O     | S                    | $\langle S^2 \rangle$ |       | Fe    | O                    | S | $\langle S^2 \rangle$ |
| [Fe(Me <sub>2</sub> pipto) <sub>3</sub> ] <sup>2+</sup> | 3.780 | 0.040 | 0.066 | 6.171                | 3.758                 | 0.026 | 0.025 | 6.020                |   |                       |
|                                                         |       | 0.061 | 0.100 | (6.001) <sup>a</sup> |                       | 0.030 | 0.061 | (6.000) <sup>a</sup> |   |                       |
|                                                         |       | 0.034 | 0.074 |                      |                       | 0.017 | 0.047 |                      |   |                       |
| [Fe(Me <sub>2</sub> pipdt) <sub>3</sub> ] <sup>2+</sup> | 3.666 | -     | 0.112 | 6.242                | 3.722                 | -     | 0.011 | 6.021                |   |                       |
|                                                         |       |       | 0.081 | (6.002) <sup>a</sup> |                       |       | 0.021 | (6.000) <sup>a</sup> |   |                       |
|                                                         |       |       | 0.068 |                      |                       |       | 0.037 |                      |   |                       |
|                                                         |       |       | 0.112 |                      |                       |       | 0.011 |                      |   |                       |
|                                                         |       |       | 0.068 |                      |                       |       | 0.021 |                      |   |                       |
|                                                         |       |       | 0.081 |                      |                       |       | 0.037 |                      |   |                       |

a: after annihilation of the first spin contaminant

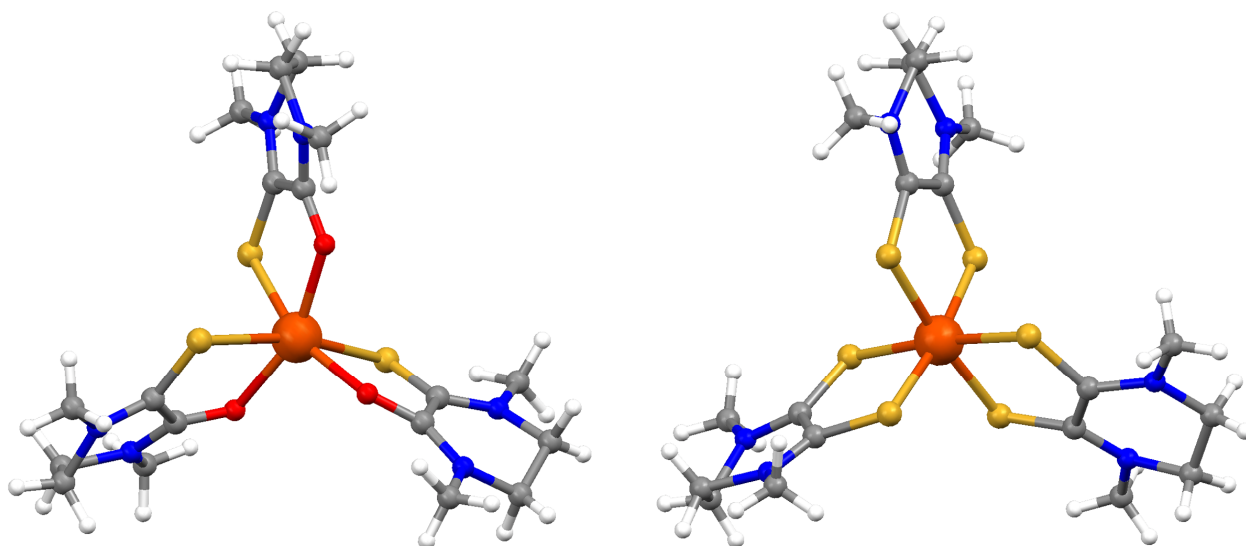

**Fig. S2.** Ball and stick drawing of the X-ray molecular structures of [Fe(Me<sub>2</sub>pipto)<sub>3</sub>]<sup>2+</sup> (left) and [Fe(Me<sub>2</sub>pipdt)<sub>3</sub>]<sup>2+</sup> (right) that were used for the DFT geometry optimizations.

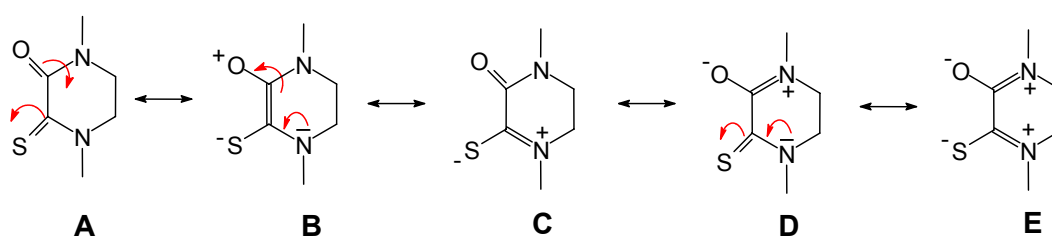

**Scheme S1.** Resonance structures of R<sub>2</sub>pipto ligand. When the ligand coordinates the structures C, D and E contribute more than in the free ligand.

### *X-ray crystallography*

A summary of data collection and structure refinement for Me<sub>2</sub>pipto (**1**), [Ni(Me<sub>2</sub>pipto)<sub>3</sub>](BF<sub>4</sub>)<sub>2</sub> (**2**), and [Fe(Me<sub>2</sub>pipto)<sub>3</sub>](BF<sub>4</sub>)<sub>2</sub> (**4**) are reported in Tables S1. Single crystal data were collected with a *Philips PW 1100* (**1**), with a *Bruker Smart APEXII* area detector diffractometer (**2**) and with a *Bruker AXS Smart 1000* (**4**). All data collection were performed with the Mo K $\alpha$  radiation ( $\lambda = 0.71073$  Å). Cell constants of Me<sub>2</sub>pipto were obtained by a least-square refinement of the setting angles of 24 randomly distributed and carefully centered reflections, whereas the unit cell parameters of [Ni(Me<sub>2</sub>pipto)<sub>3</sub>](BF<sub>4</sub>)<sub>2</sub> and [Fe(Me<sub>2</sub>pipto)<sub>3</sub>](BF<sub>4</sub>)<sub>2</sub> were obtained using 60  $\omega$ -frames of 0.5° width and scanned from three different zone of reciprocal lattice. The intensity data of **2** and **4** were integrated from several series of exposures frames (0.3° width) covering the sphere of reciprocal space.<sup>9</sup> Absorption corrections were applied using the program NEWABS92 (Me<sub>2</sub>pipto, min. and max. transmission factors: 0.905-1.000),<sup>10</sup> and the program SADABS<sup>11</sup> (**2** and **4** with min. and max. transmission factors of 0.850-1.000 and 0.651-1.000, respectively). The structures were solved by direct methods (SIR97<sup>12</sup>) and refined on  $F^2$  with full-matrix least squares (SHELXL-97<sup>13</sup>), using the Wingx software package.<sup>14</sup> In the [Ni(Me<sub>2</sub>pipto)<sub>3</sub>](BF<sub>4</sub>)<sub>2</sub> complex the BF<sub>4</sub><sup>-</sup> counterions were both disordered in two positions and were refined with site occupancy factors of 0.68/0.32 and 0.55/0.45. The complex [Fe(Me<sub>2</sub>pipto)<sub>3</sub>](BF<sub>4</sub>)<sub>2</sub> lie on a binary axis and one of the ligands is disordered in two equivalent positions in which the O and S atoms are exchanged. Non hydrogen atoms were refined anisotropically for all compounds, and the hydrogen atoms were placed at their calculated positions. Graphical material was prepared with the ORTEP3 for Windows<sup>15</sup> and Mercury 2.0<sup>16</sup> programs. CCDC 771140-771142 contain the supplementary crystallographic data for this paper.

**Table S3.** Summary of X-ray crystallographic data for **1**, **2** and **4**.

|                                                    | Me <sub>2</sub> pipto ( <b>1</b> )               | [Ni(Me <sub>2</sub> pipto) <sub>3</sub> ](BF <sub>4</sub> ) <sub>2</sub> ( <b>2</b> )                        | [Fe(Me <sub>2</sub> pipto) <sub>3</sub> ](BF <sub>4</sub> ) <sub>2</sub> ( <b>4</b> )                        |
|----------------------------------------------------|--------------------------------------------------|--------------------------------------------------------------------------------------------------------------|--------------------------------------------------------------------------------------------------------------|
| Empirical formula                                  | C <sub>6</sub> H <sub>10</sub> N <sub>2</sub> OS | C <sub>18</sub> H <sub>30</sub> B <sub>2</sub> F <sub>8</sub> NiN <sub>6</sub> O <sub>3</sub> S <sub>3</sub> | C <sub>18</sub> H <sub>30</sub> B <sub>2</sub> F <sub>8</sub> FeN <sub>6</sub> O <sub>3</sub> S <sub>3</sub> |
| Formula weight                                     | 158.22                                           | 706.99                                                                                                       | 704.13                                                                                                       |
| Colour, habit                                      | Yellow, block                                    | Brown, block                                                                                                 | Brown, prism                                                                                                 |
| Crystal size, mm                                   | 0.43x0.40x0.30                                   | 0.47 x 0.31 x 0.16                                                                                           | 0.55x0.45x0.30                                                                                               |
| Crystal system                                     | Orthorhombic                                     | Monoclinic                                                                                                   | Monoclinic                                                                                                   |
| Space group                                        | <i>Pna</i> 2 <sub>1</sub>                        | <i>P</i> 2 <sub>1</sub> / <i>n</i>                                                                           | <i>C</i> 2/ <i>c</i>                                                                                         |
| <i>a</i> , Å                                       | 9.758(4)                                         | 12.541(1)                                                                                                    | 20.40(1)                                                                                                     |
| <i>b</i> , Å                                       | 6.731(3)                                         | 12.255(1)                                                                                                    | 10.992(8)                                                                                                    |
| <i>c</i> , Å                                       | 11.686(6)                                        | 19.659(1)                                                                                                    | 16.20(1)                                                                                                     |
| α, deg.                                            | 90                                               | 90                                                                                                           | 90                                                                                                           |
| β, deg.                                            | 90                                               | 101.198(3)                                                                                                   | 129.60(2)                                                                                                    |
| γ, deg.                                            | 90                                               | 90                                                                                                           | 90                                                                                                           |
| <i>V</i> , Å <sup>3</sup>                          | 767.5(6)                                         | 2963.9(4)                                                                                                    | 2799(3)                                                                                                      |
| <i>Z</i>                                           | 4                                                | 4                                                                                                            | 4                                                                                                            |
| <i>T</i> , K                                       | 293(2)                                           | 293(2)                                                                                                       | 293(2)                                                                                                       |
| ρ (calc), Mg/m <sup>3</sup>                        | 1.369                                            | 1.584                                                                                                        | 1.671                                                                                                        |
| μ, mm <sup>-1</sup>                                | 0.354                                            | 0.949                                                                                                        | 0.851                                                                                                        |
| θ range, deg.                                      | 3.49 to 26.99                                    | 1.78 to 31.85                                                                                                | 2.25 to 26.00                                                                                                |
| Rflcn collected                                    | 1067                                             | 49228 / 9916                                                                                                 | 13694 / 2731                                                                                                 |
| Indep Rflcn ( <i>R</i> <sub>int</sub> )            | 962 (0.0320)                                     | 9916(0.0355)                                                                                                 | 2731 (0.0396)                                                                                                |
| Abs. struct. Param.                                | -0.09(15)                                        | -                                                                                                            | -                                                                                                            |
| GooF                                               | 1.005                                            | 1.004                                                                                                        | 1.075                                                                                                        |
| <i>R</i> 1 [ <i>I</i> >2σ( <i>I</i> )]             | 0.0431                                           | 0.0397                                                                                                       | 0.0547                                                                                                       |
| <i>wR</i> <sub>2</sub> [ <i>I</i> >2σ( <i>I</i> )] | 0.0738                                           | 0.1079                                                                                                       | 0.1429                                                                                                       |

$R1 = \frac{\sum ||F_o| - |F_c||}{\sum |F_o|}$ ,  $wR2 = \frac{[\sum (w(F_o^2 - F_c^2)^2)]}{\sum [w(F_o^2)^2]}^{1/2}$ ,  $w = 1/[\sigma^2(F_o^2) + (aP)^2 + bP]$ , where  $P = [\max(F_o^2, 0) + 2F_c^2]/3$



**Table S4.** Bond Lengths (Å) and Angles (deg) with Estimated Standard Deviations in Parentheses for Me<sub>2</sub>pipto (**1**).

|    |    |          |    |    |    |          |    |    |    |          |
|----|----|----------|----|----|----|----------|----|----|----|----------|
| S1 | C1 | 1.642(4) | C1 | N2 | C4 | 122.4(4) | N1 | C2 | O2 | 122.3(4) |
| N2 | C1 | 1.348(5) | C1 | N2 | C6 | 121.4(4) | N1 | C2 | C1 | 116.5(4) |
| N2 | C4 | 1.469(6) | C4 | N2 | C6 | 115.9(4) | O2 | C2 | C1 | 121.3(4) |
| N2 | C6 | 1.480(6) | C3 | N1 | C2 | 121.9(4) |    |    |    |          |
| N1 | C3 | 1.461(5) | C3 | N1 | C5 | 117.4(4) |    |    |    |          |
| N1 | C2 | 1.361(5) | C2 | N1 | C5 | 119.8(4) |    |    |    |          |
| N1 | C5 | 1.465(5) | S1 | C1 | N2 | 124.4(4) |    |    |    |          |
| O2 | C2 | 1.218(5) | S1 | C1 | C2 | 118.7(3) |    |    |    |          |
| C1 | C2 | 1.538(6) | N2 | C1 | C2 | 116.9(4) |    |    |    |          |
| C4 | C3 | 1.502(6) | N2 | C4 | C3 | 108.6(4) |    |    |    |          |
|    |    |          | N1 | C3 | C4 | 109.9(4) |    |    |    |          |

**Table S5.** Selected Bond Lengths (Å) and Angles (deg) with Estimated Standard Deviations in Parentheses for [Ni(Me<sub>2</sub>pipto)<sub>3</sub>](BF<sub>4</sub>)<sub>2</sub> (**2**).

|     |     |           |     |     |     |           |     |     |     |          |
|-----|-----|-----------|-----|-----|-----|-----------|-----|-----|-----|----------|
| Ni  | S12 | 2.4174(6) | S12 | Ni  | S13 | 103.59(2) | C22 | N12 | C32 | 120.9(2) |
| Ni  | S13 | 2.4150(7) | S12 | Ni  | S11 | 96.07(2)  | C22 | N12 | C52 | 121.0(2) |
| Ni  | S11 | 2.3839(5) | S12 | Ni  | O23 | 167.91(4) | C32 | N12 | C52 | 117.9(2) |
| Ni  | O23 | 2.032(1)  | S12 | Ni  | O21 | 88.69(4)  | O22 | C22 | N12 | 123.0(2) |
| Ni  | O21 | 2.051(1)  | S12 | Ni  | O22 | 82.14(4)  | O22 | C22 | C12 | 119.6(2) |
| Ni  | O22 | 2.074(1)  | S13 | Ni  | S11 | 93.46(2)  | N12 | C22 | C12 | 117.4(2) |
| S12 | C12 | 1.669(2)  | S13 | Ni  | O23 | 82.76(4)  | S12 | C12 | N22 | 125.9(2) |
| S13 | C13 | 1.676(2)  | S13 | Ni  | O21 | 167.55(4) | S12 | C12 | C22 | 116.8(1) |
| S11 | C11 | 1.675(2)  | S13 | Ni  | O22 | 88.03(4)  | N22 | C12 | C22 | 117.3(2) |
| O23 | C23 | 1.241(2)  | S11 | Ni  | O23 | 93.77(4)  | N11 | C21 | O21 | 122.1(2) |
| N11 | C21 | 1.317(3)  | S11 | Ni  | O21 | 83.01(4)  | N11 | C21 | C11 | 117.8(2) |
| N11 | C31 | 1.458(3)  | S11 | Ni  | O22 | 177.90(4) | O21 | C21 | C11 | 119.8(2) |
| N11 | C51 | 1.458(3)  | O23 | Ni  | O21 | 85.55(5)  | S11 | C11 | N21 | 123.8(1) |
| O21 | C21 | 1.246(2)  | O23 | Ni  | O22 | 87.88(5)  | S11 | C11 | C21 | 117.6(1) |
| N22 | C12 | 1.313(3)  | O21 | Ni  | O22 | 95.84(5)  | N21 | C11 | C21 | 118.5(2) |
| N22 | C42 | 1.467(3)  | Ni  | S12 | C12 | 96.31(7)  | N11 | C31 | C41 | 111.3(2) |
| N22 | C62 | 1.463(3)  | Ni  | S13 | C13 | 96.53(7)  | C23 | N13 | C33 | 121.3(2) |
| O22 | C22 | 1.241(2)  | Ni  | S11 | C11 | 96.73(6)  | C23 | N13 | C53 | 119.3(2) |
| N21 | C11 | 1.308(2)  | Ni  | O23 | C23 | 122.1(1)  | C33 | N13 | C53 | 119.0(2) |
| N21 | C41 | 1.476(3)  | C21 | N11 | C31 | 123.0(2)  | S13 | C13 | C23 | 117.9(1) |
| N21 | C61 | 1.456(3)  | C21 | N11 | C51 | 119.6(2)  | S13 | C13 | N23 | 124.6(2) |
| C23 | N13 | 1.318(2)  | C31 | N11 | C51 | 117.1(2)  | C23 | C13 | N23 | 117.5(2) |
| C23 | C13 | 1.520(3)  | Ni  | O21 | C21 | 120.4(1)  | N13 | C33 | C43 | 109.6(2) |
| N23 | C13 | 1.316(3)  | C12 | N22 | C42 | 120.0(2)  | N21 | C41 | C31 | 111.0(2) |
| N23 | C43 | 1.475(3)  | C12 | N22 | C62 | 121.9(2)  | N22 | C42 | C32 | 110.0(2) |
| N23 | C63 | 1.466(3)  | C42 | N22 | C62 | 117.9(2)  | N12 | C32 | C42 | 109.6(2) |
| N12 | C22 | 1.321(2)  | Ni  | O22 | C22 | 120.1(1)  | N23 | C43 | C33 | 110.4(2) |
| N12 | C32 | 1.462(3)  | C11 | N21 | C41 | 119.3(2)  |     |     |     |          |
| N12 | C52 | 1.461(3)  | C11 | N21 | C61 | 121.0(2)  |     |     |     |          |
| C22 | C12 | 1.511(2)  | C41 | N21 | C61 | 119.4(2)  |     |     |     |          |
| C21 | C11 | 1.515(2)  | O23 | C23 | N13 | 122.1(2)  |     |     |     |          |
| C31 | C41 | 1.486(3)  | O23 | C23 | C13 | 119.1(2)  |     |     |     |          |
| N13 | C33 | 1.463(3)  | N13 | C23 | C13 | 118.8(2)  |     |     |     |          |
| N13 | C53 | 1.455(3)  | C13 | N23 | C43 | 120.4(2)  |     |     |     |          |
| C33 | C43 | 1.491(3)  | C13 | N23 | C63 | 121.3(2)  |     |     |     |          |
| C42 | C32 | 1.493(4)  | C43 | N23 | C63 | 117.9(2)  |     |     |     |          |

**Table S6.** Selected Bond Lengths (Å) and Angles (deg) with Estimated Standard Deviations in Parentheses for [Fe(Me<sub>2</sub>pipto)<sub>3</sub>](BF<sub>4</sub>)<sub>2</sub> (**4**).

|       |         |          |         |       |         |           |         |    |         |           |
|-------|---------|----------|---------|-------|---------|-----------|---------|----|---------|-----------|
| C(11) | N(21)   | 1.288(5) | N(21)   | C(11) | C(21)   | 117.0(3)  | O(22)#1 | Fe | O(21)#1 | 103.2(2)  |
| C(11) | C(21)   | 1.493(5) | N(21)   | C(11) | S(11)   | 124.9(3)  | O(22)   | Fe | O(21)#1 | 95.0(2)   |
| C(11) | S(11)   | 1.654(4) | C(21)   | C(11) | S(11)   | 118.1(3)  | O(21)   | Fe | O(21)#1 | 158.9(2)  |
| C(12) | O(22)   | 1.243(7) | O(22)   | C(12) | N(12)   | 138.3(5)  | O(22)#1 | Fe | S(11)   | 159.2(2)  |
| C(12) | N(12)   | 1.278(6) | O(22)   | C(12) | C(12)#1 | 103.7(4)  | O(22)   | Fe | S(11)   | 100.4(2)  |
| C(12) | C(12)#1 | 1.483(9) | N(12)   | C(12) | C(12)#1 | 117.8(3)  | O(21)   | Fe | S(11)   | 79.01(9)  |
| C(12) | S(12)   | 1.672(5) | N(12)   | C(12) | S(12)   | 112.0(4)  | O(21)#1 | Fe | S(11)   | 87.32(9)  |
| C(31) | N(11)   | 1.445(5) | C(12)#1 | C(12) | S(12)   | 130.2(2)  | O(22)#1 | Fe | S(11)#1 | 100.4(2)  |
| C(31) | C(41)   | 1.467(6) | N(11)   | C(31) | C(41)   | 109.7(3)  | O(22)   | Fe | S(11)#1 | 159.2(2)  |
| C(32) | N(12)   | 1.421(7) | N(12)   | C(32) | C(32)#1 | 110.4(4)  | O(21)   | Fe | S(11)#1 | 87.32(9)  |
| C(32) | C(32)#1 | 1.46(1)  | N(21)   | C(41) | C(31)   | 109.4(3)  | O(21)#1 | Fe | S(11)#1 | 79.01(9)  |
| C(41) | N(21)   | 1.450(5) | O(21)   | C(21) | N(11)   | 123.3(3)  | S(11)   | Fe | S(11)#1 | 99.22(9)  |
| C(51) | N(11)   | 1.432(5) | O(21)   | C(21) | C(11)   | 118.2(3)  | O(22)#1 | Fe | S(12)#1 | 16.6(2)   |
| C(52) | N(12)   | 1.431(7) | N(11)   | C(21) | C(11)   | 118.5(3)  | O(22)   | Fe | S(12)#1 | 77.6(2)   |
| C(61) | N(21)   | 1.439(5) | C(21)   | N(11) | C(51)   | 121.6(3)  | O(21)   | Fe | S(12)#1 | 89.0(1)   |
| C(21) | O(21)   | 1.222(4) | C(21)   | N(11) | C(31)   | 121.2(3)  | O(21)#1 | Fe | S(12)#1 | 105.4(1)  |
| C(21) | N(11)   | 1.297(5) | C(51)   | N(11) | C(31)   | 116.8(3)  | S(11)   | Fe | S(12)#1 | 167.19(6) |
| O(21) | Fe      | 2.072(3) | C(12)   | N(12) | C(32)   | 122.1(4)  | S(11)#1 | Fe | S(12)#1 | 84.69(9)  |
| F(1)  | B       | 1.361(7) | C(12)   | N(12) | C(52)   | 120.9(6)  | O(22)#1 | Fe | S(12)   | 77.6(2)   |
| F(2)  | B       | 1.351(7) | C(32)   | N(12) | C(52)   | 116.7(6)  | O(22)   | Fe | S(12)   | 16.6(2)   |
| F(3)  | B       | 1.340(7) | C(11)   | N(21) | C(61)   | 120.5(3)  | O(21)   | Fe | S(12)   | 105.4(1)  |
| F(4)  | B       | 1.328(7) | C(11)   | N(21) | C(41)   | 121.0(3)  | O(21)#1 | Fe | S(12)   | 89.0(1)   |
| S(11) | Fe      | 2.465(2) | C(61)   | N(21) | C(41)   | 118.2(3)  | S(11)   | Fe | S(12)   | 84.69(9)  |
| S(12) | Fe      | 2.511(3) | C(21)   | O(21) | Fe      | 124.0(2)  | S(11)#1 | Fe | S(12)   | 167.19(6) |
| O(22) | Fe      | 2.041(6) | C(11)   | S(11) | Fe      | 97.99(14) | S(12)#1 | Fe | S(12)   | 94.2(1)   |
| Fe    | O(22)#1 | 2.041(6) | C(12)   | S(12) | Fe      | 91.5(2)   |         |    |         |           |
| Fe    | O(21)#1 | 2.072(3) | C(12)   | O(22) | Fe      | 135.4(5)  |         |    |         |           |
| Fe    | S(11)#1 | 2.465(2) | O(22)#1 | Fe    | O(22)   | 61.2(4)   |         |    |         |           |
| Fe    | S(12)#1 | 2.511(3) | O(22)#1 | Fe    | O(21)   | 95.0(2)   |         |    |         |           |
|       |         |          | O(22)   | Fe    | O(21)   | 103.2(2)  |         |    |         |           |

#1 = 1-x, y, 1/2-z.

## References

1. Gaussian 03, Revision C.02, M. J. Frisch, G. W. Trucks, H. B. Schlegel, G. E. Scuseria, M. A. Robb, J. R. Cheeseman, Jr., J. A. Montgomery, T. Vreven, K. N. Kudin, J. C. Burant, J. M. Millam, S. S. Iyengar, J. Tomasi, V. Barone, B. Mennucci, M. Cossi, G. Scalmani, N. Rega, G. A. Petersson, H. Nakatsuji, M. Hada, M. Ehara, K. Toyota, R. Fukuda, J. Hasegawa, M. Ishida, T. Nakajima, Y. Honda, O. Kitao, H. Nakai, M. Klene, X. Li, J. E. Knox, H. P. Hratchian, J. B. Cross, V. Bakken, C. Adamo, J. Jaramillo, R. Gomperts, R. E. Stratmann, O. Yazyev, A. J. Austin, R. Cammi, C. Pomelli, J. W. Ochterski, P. Y. Ayala, K. Morokuma, G. A. Voth, P. Salvador, J. J. Dannenberg, V. G. Zakrzewski, S. Dapprich, A. D. Daniels, M. C. Strain, O. Farkas, D. K. Malick, A. D. Rabuck, K. Raghavachari, J. B. Foresman, J. V. Ortiz, Q. Cui, A. G. Baboul, S. Clifford, J. Cioslowski, B. B. Stefanov, G. Liu, A. Liashenko, P. Piskorz, I. Komaromi, R. L. Martin, D. J. Fox, T. Keith, M. A. Al-Laham, C. Y. Peng, A. Nanayakkara, M. Challacombe, P. M. W. Gill, B. Johnson, W. Chen, M. W. Wong, C. Gonzalez, and J. A. Pople, *Gaussian, Inc.*, Wallingford CT, 2004.
2. A. D. Becke, Density-functional exchange-energy approximation with correct asymptotic behavior. *Physical Review A: Atomic, Molecular, and Optical Physics* 1988, **38**[6], 3098.
3. A. D. Becke, Density-Functional Thermochemistry .3. the Role of Exact Exchange. *Journal of Chemical Physics* 1993, **98** (7), 5648.
4. R. Ditchfield, W. J. Hehre, and J. A. Pople, *J. Chem. Phys.* 1971, **54**, 724.
5. V. A. Rassolov, M. A. Ratner, J. A. Pople, P. C. Redfern, and L. A. Curtiss, *J. Comp. Chem.* 2001, **22**, 976.
6. GaussView, Version 3.09, R. Dennington II, T. Keith, J. Millam, K. Eppinnett, W. L. Hovell and R. Gilliland, Semichem, Inc., Shawnee Mission, KS, 2003.
7. N. C. Handy, A. J. Cohen, *Mol. Phys.* 2001, **99** (5), 403.
8. R. G. Pearson, *Proc. Natl. Acad. Sci. USA*, 1986, **83**, 8440.
9. SMART (control) and SAINT (integration) software for CCD systems, Bruker AXS, Madison, WI, USA, 1994, 2008.
10. (a) N. Walker, D. Stuart, *Acta Crystallogr., Sect. A* 1983, **39**, 158; (b) F. Uguzzoli, *Comput. Chem.* 1987, **11**, 109.
11. Area-Detector Absorption Correction; Siemens Industrial Automation, Inc.: Madison, WI, 1996.
12. A. Altomare, M. C. Burla, M. Camalli, G. L. Casciarano, C. Giacovazzo, A. Guagliardi, A. G. G. Moliterni, G. Polidori and R. Spagna, SIR97: a new tool for crystal structure determination and refinement, *Journal of Applied Crystallography* 1999, **32**, 115.
13. G. M. Sheldrick, *SHELX97. Programs for Crystal Structure Analysis* 1997 (Release 97-2), University of Göttingen, Germany 2008.

14. L. J. Farrugia, WinGX suite for small-molecule single-crystal crystallography. *Journal of Applied Crystallography* 1999, **32**[4], 837.
15. L. J. Farrugia, ORTEP-3 for Windows - a version of ORTEP-III with a Graphical User Interface (GUI), *Journal of Applied Crystallography* 1997, **30**, 568.
16. C. F. Macrae, P. R. Edgington, P. McCabe, E. Pidcock, G. P. Shields, R. Taylor, M. Towler, J. van de Streek, *J. Appl. Crystallogr.* 2006, **39**, 453.
